# Supplementary material
Source: publisher site journal article supplement (https://www.spandidos-publications.com/2847/downloadSupplementary)

Figure S1. Schematic illustration of the proposed model for the role of XIST in myocardial fibrosis. lncRNA-XIST promotes the proliferation of cardiac fibroblasts and the accumulation of extracellular matrix by sponging miR-155-5p. lncRNA, long non-coding RNA; miRNA/miR, microRNA; Col, collagen;  $\alpha$ -SMA,  $\alpha$  smooth muscle actin.

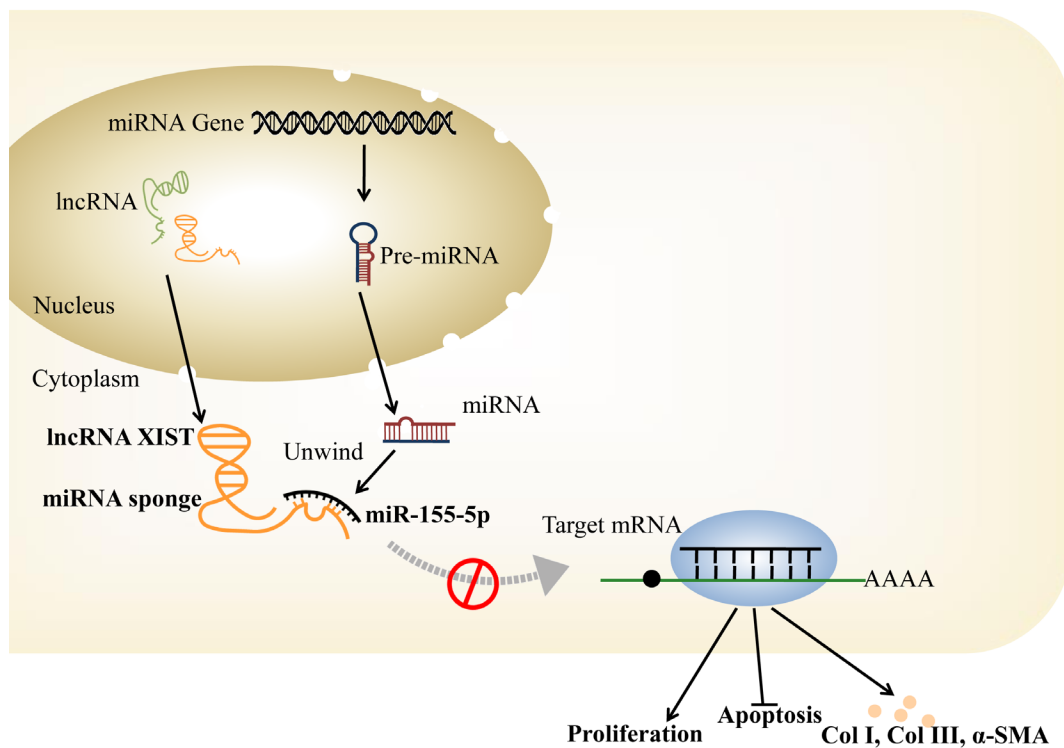

Supplement: Supplementary file 1 [file downloadSupplementary]
